# Supplementary material for: The clinical significance of single or double bands in cerebrospinal fluid isoelectric focusing. A retrospective study and systematic review
Source: PubMed Central journal article supplement (PMC6464233; doi:10.1371/journal.pone.0215410), 2019-04-15
Supplement: pone.0215410.s002.pdf [file pone.0215410.s002.pdf]

**S1 Table. Clinical diagnoses of all patients with borderline OCB pattern**

| <b>Diagnosis</b>                                           | <b>No. of patients</b> | <b>No. of samples</b> |
|------------------------------------------------------------|------------------------|-----------------------|
| <b>Inflammatory neurological disease (IND)</b>             |                        |                       |
| Multiple sclerosis                                         | 10                     | 11                    |
| Meningitis                                                 | 8                      |                       |
| Vasculitis                                                 | 6                      |                       |
| Myelitis                                                   | 5                      | 7                     |
| Meningoencephalitis                                        | 4                      | 5                     |
| HIV encephalopathy                                         | 3                      |                       |
| Parainfectious viral polyradiculomyelitis                  | 2                      | 3                     |
| Optic neuritis                                             | 2                      |                       |
| St. p. CNS tuberculosis                                    | 2                      |                       |
| Neuromyelitis optica                                       | 1                      | 2                     |
| Acute disseminated encephalomyelitis                       | 1                      |                       |
| Encephalitis                                               | 1                      |                       |
| Brain abscess                                              | 1                      |                       |
| Neurolues                                                  | 1                      |                       |
| Hemichorea Sydenham                                        | 1                      |                       |
| Schilder's disease                                         | 1                      |                       |
| <b>Peripheral inflammatory neurological disease (PIND)</b> |                        |                       |
| Guillain-Barré syndrome                                    | 17                     | 21                    |
| Chronic inflammatory demyelinating polyneuropathy          | 4                      | 7                     |
| Vestibular neuritis                                        | 5                      |                       |
| Ramsay-Hunt syndrome                                       | 2                      |                       |
| Neuralgic amyotrophy                                       | 1                      |                       |
| <b>Non-inflammatory neurological disease (NIND)</b>        |                        |                       |
| Stroke                                                     | 18                     |                       |
| Polyneuropathy                                             | 14                     | 15                    |
| Traumatic brain injury                                     | 5                      |                       |
| Amyotrophic lateral sclerosis                              | 5                      |                       |
| Alzheimer's dementia                                       | 4                      |                       |

|                                                         |    |   |
|---------------------------------------------------------|----|---|
| (Spino)cerebellar ataxia                                | 4  |   |
| Hydrocephalus                                           | 3  |   |
| CNS neoplasia                                           | 3  |   |
| Myelopathy                                              | 3  |   |
| Subcortical arteriosclerotic encephalopathy             | 3  |   |
| Metabolic-toxic encephalopathy                          | 3  |   |
| Parkinson disease                                       | 2  |   |
| Dystonia                                                | 2  |   |
| Ischemic cranial nerve palsy                            | 2  |   |
| Spastic spinal paralysis                                | 2  |   |
| Leukoencephalopathy, toxic/ vascular                    | 2  |   |
| Intracranial hypertension                               | 1  | 2 |
| Corticobasal degeneration                               | 1  |   |
| Epilepsy                                                | 1  |   |
| Delir                                                   | 1  |   |
| Developmental retardation                               | 1  |   |
| Hypovitaminosis B12                                     | 1  |   |
| Myasthenia gravis                                       | 1  |   |
| Myopathy                                                | 1  |   |
| Meralgia paraesthetica                                  | 1  |   |
| Toxic opticopathy                                       | 1  |   |
| Traumatic peripheral nerve lesion                       | 1  |   |
| Vascular malformation                                   | 1  |   |
| <b>Symptomatic controls (SC)</b>                        |    |   |
| Vertebrogenic syndrome                                  | 20 |   |
| Bell's facial palsy                                     | 8  |   |
| Sensory disturbance/ dizziness                          | 7  |   |
| Migraine                                                | 7  |   |
| Tension headache                                        | 4  |   |
| Thunderclap headache                                    | 1  |   |
| Other headache: associated with infection/ hypertension | 4  |   |
| Benign paroxysmal position vertigo                      | 1  |   |

| <b>No neurological disease (NND)</b>                      |   |   |
|-----------------------------------------------------------|---|---|
| Somatoform disorder                                       | 7 | 8 |
| Depression/ schizophrenia/ Bulimia nervosa/ panic attacks | 5 |   |
| Lues latens                                               | 3 |   |
| Anterior ischemic optic neuropathy                        | 3 |   |
| AIDS (defined by pneumocystis carinii pneumonia)          | 1 |   |
| Zoster ophtalmicus                                        | 1 |   |

AIDS, acquired immune deficiency syndrome; CNS, central nervous system; St.p., status post
