# Supplementary material for: The clinical significance of single or double bands in cerebrospinal fluid isoelectric focusing. A retrospective study and systematic review
Source: PubMed Central journal article supplement (PMC6464233; doi:10.1371/journal.pone.0215410), 2019-04-15
Supplement: pone.0215410.s003.pdf [file pone.0215410.s003.pdf]

**S2 Table. OCB sub-pattern of all patients according to disease groups**

|               | IND |              | NIND |              | PIND |              | SC |              | NND |              |
|---------------|-----|--------------|------|--------------|------|--------------|----|--------------|-----|--------------|
| <b>Type a</b> | 23  | 41.8%        | 26   | 29.2%        | 10   | 27.8%        | 18 | 34.6%        | 4   | 19.0%        |
| <b>Type b</b> | 6   | 10.9%        | 19   | 21.3%        | 5    | 13.9%        | 9  | 17.3%        | 2   | 9.5%         |
| <b>Type c</b> | 26  | <b>47.3%</b> | 44   | <b>49.4%</b> | 21   | <b>58.3%</b> | 25 | <b>48.1%</b> | 15  | <b>71.4%</b> |

In the whole cohort (n=253), frequency of original OCB sub-pattern *a*, *b* and *c* are shown for each disease group (sub-pattern with the highest frequency are marked bold).

*Abbreviations:* IND, inflammatory neurological disease; NIND, non-inflammatory neurological disease; NND, no neurological disease; OCB, oligoclonal bands; PIND, peripheral inflammatory neurological disease; SC, symptomatic control
