# Supplementary material for: The clinical significance of single or double bands in cerebrospinal fluid isoelectric focusing. A retrospective study and systematic review
Source: PubMed Central journal article supplement (PMC6464233; doi:10.1371/journal.pone.0215410), 2019-04-15
Supplement: pone.0215410.s004.pdf [file pone.0215410.s004.pdf]

**S3 Table. Association of IgG index with reproducibility of borderline OCB pattern**

| IgG index | IEF I<br>Frequency of OCB borderline pattern<br>(n=234) |       |               |       |               |       | IEF II<br>Failure to reproduce identical<br>OCB sub-pattern<br>(n=94) |        |    |       | IEF II<br>Failure to reproduce any<br>borderline OCB pattern<br>(n=94) |       |    |       |
|-----------|---------------------------------------------------------|-------|---------------|-------|---------------|-------|-----------------------------------------------------------------------|--------|----|-------|------------------------------------------------------------------------|-------|----|-------|
|           | Type <i>a</i>                                           |       | Type <i>b</i> |       | Type <i>c</i> |       | Yes                                                                   |        | No |       | Yes                                                                    |       | No |       |
| <b>Q1</b> | 22                                                      | 38.6% | 6             | 10.5% | 29            | 50.9% | 15                                                                    | 75.0%  | 5  | 25.0% | 13                                                                     | 65.0% | 7  | 35.0% |
| <b>Q2</b> | 18                                                      | 30.5% | 11            | 18.6% | 30            | 50.8% | 26                                                                    | 100.0% | 0  | 0.0%  | 20                                                                     | 76.9% | 6  | 23.1% |
| <b>Q3</b> | 19                                                      | 32.2% | 12            | 20.3% | 28            | 47.5% | 27                                                                    | 90.0%  | 3  | 10.0% | 23                                                                     | 76.7% | 7  | 23.3% |
| <b>Q4</b> | 18                                                      | 30.5% | 8             | 13.6% | 33            | 55.9% | 16                                                                    | 88.9%  | 2  | 11.1% | 12                                                                     | 66.7% | 6  | 33.3% |

Quartiles of IgG index were separated by values of 0.44, 0.50 and 0.56. IgG index was calculated as (CSF IgG/ serum IgG)/ (CSF albumin/ serum albumin). *Abbreviations:* IEF, isoelectric focusing; IgG, immunoglobulin G; OCB, oligoclonal bands; Q, quartile
