# Supplementary material for: The clinical significance of single or double bands in cerebrospinal fluid isoelectric focusing. A retrospective study and systematic review
Source: PubMed Central journal article supplement (PMC6464233; doi:10.1371/journal.pone.0215410), 2019-04-15
Supplement: pone.0215410.s005.pdf [file pone.0215410.s005.pdf]

**S4 Table. Calculation of OCB diagnostic specificity using a cut-off  $\geq 2$  CSF-restricted bands**

| Publication        | ALL                 |                            |                 | NIND and SC (1)     |                            |                 |
|--------------------|---------------------|----------------------------|-----------------|---------------------|----------------------------|-----------------|
|                    | Total N of controls | N of OCB negative patients | Specificity (%) | Total N of controls | N of OCB negative patients | Specificity (%) |
| Bayart 2018        | 39                  | 39                         | 100             | 39                  | 39                         | 100             |
| Christiansen 2018  | 97                  | 91                         | 94              |                     |                            |                 |
| Gurtner 2018       | 144                 | 121                        | 84              | 144                 | 121                        | 84              |
| Dias-Carneiro 2016 | 26                  | 25                         | 96              | 26                  | 25                         | 96              |
| Zeman 2015         | 94                  | 83                         | 88              | 94                  | 83                         | 88              |
| Abraira 2011       | 29                  | 28                         | 97              | 29                  | 28                         | 97              |
| Gama 2009          | 19                  | 19                         | 100             | 19                  | 19                         | 100             |
| Mygland 2007       | 255                 | 245                        | 96              | 255                 | 245                        | 96              |
| Sa 2005            | 173                 | 167                        | 97              | 173                 | 167                        | 97              |
| Bednarova 2005     | 15                  | 14                         | 93              |                     |                            |                 |
| Villar 2005        | 334                 | 332                        | 99              |                     |                            |                 |
| Haghighi 2000      | 50                  | 48                         | 96              | 50                  | 48                         | 96              |
| Marchetti 1999     | 22                  | 20                         | 91              | 22                  | 20                         | 91              |
| Cowdrey 1993       | 144                 | 142                        | 99              |                     |                            |                 |
| Öhman 1992         | 211                 | 207                        | 98              | 211                 | 207                        | 98              |
| Kostulas 1987      | 897                 | 813                        | 91              | 897                 | 813                        | 91              |
| Link 1983          | 902                 | 780                        | 86              |                     |                            |                 |
| <b>Total</b>       | <b>3451</b>         | <b>3174</b>                | <b>92</b>       | <b>1959</b>         | <b>1815</b>                | <b>93</b>       |

(1) Studies that included only patients with NIND and SC are shown and used for specificity calculation.

| Publication        | Total N of IND and PIND | Studies with mixed groups (2)<br>IND and PIND excluded - Best OCB Case |                            |                 | Studies with mixed groups (3)<br>IND and PIND excluded - Worst OCB Case |                            |                 |
|--------------------|-------------------------|------------------------------------------------------------------------|----------------------------|-----------------|-------------------------------------------------------------------------|----------------------------|-----------------|
|                    |                         | Total N of controls                                                    | N of OCB negative patients | Specificity (%) | Total N of controls                                                     | N of OCB negative patients | Specificity (%) |
| Bayart 2018        |                         |                                                                        |                            |                 |                                                                         |                            |                 |
| Christiansen 2018  | 3                       | 94                                                                     | 91                         | 97              | 94                                                                      | 88                         | 94              |
| Gurtner 2018       |                         |                                                                        |                            |                 |                                                                         |                            |                 |
| Dias-Carneiro 2016 |                         |                                                                        |                            |                 |                                                                         |                            |                 |
| Zeman 2015         |                         |                                                                        |                            |                 |                                                                         |                            |                 |
| Abraira 2011       |                         |                                                                        |                            |                 |                                                                         |                            |                 |
| Gama 2009          |                         |                                                                        |                            |                 |                                                                         |                            |                 |
| Mygland 2007       |                         |                                                                        |                            |                 |                                                                         |                            |                 |
| Sa 2005            |                         |                                                                        |                            |                 |                                                                         |                            |                 |
| Bednarova 2005     | 7                       | 8                                                                      | 8                          | 100             | 8                                                                       | 7                          | 88              |
| Villar 2005        | 63                      | 271                                                                    | 271                        | 100             | 271                                                                     | 269                        | 99              |
| Haghighi 2000      |                         |                                                                        |                            |                 |                                                                         |                            |                 |
| Marchetti 1999     |                         |                                                                        |                            |                 |                                                                         |                            |                 |
| Cowdrey 1993       | 9                       | 135                                                                    | 135                        | 100             | 135                                                                     | 133                        | 99              |
| Öhman 1992         |                         |                                                                        |                            |                 |                                                                         |                            |                 |
| Kostulas 1987      |                         |                                                                        |                            |                 |                                                                         |                            |                 |
| Link 1983          | 14                      | 888                                                                    | 780                        | 88              | 888                                                                     | 766                        | 86              |
| <b>Total</b>       | <b>96</b>               | <b>1396</b>                                                            | <b>1285</b>                | <b>92</b>       | <b>1396</b>                                                             | <b>1263</b>                | <b>90</b>       |

(2) Studies that included patients with NIND/SC and IND/PIND are shown. The N of patients with IND/PIND are subtracted from the total N of controls, but not from the N of OCB negative patients. This approach results in a "Best OCB" scenario, where excluded IND/PIND are considered OCB positive.

(3) Studies that included patients with NIND/SC and IND/PIND are shown. The N of patients with IND/PIND are subtracted from the total N of controls and from the N of OCB negative patients. This approach results in a "Worst OCB" scenario, where excluded IND/PIND are considered OCB negative.

| Publication        | ALL STUDIES (4)<br>IND and PIND excluded - Best OCB Case |                               |                 | ALL STUDIES (5)<br>IND and PIND excluded - Worst OCB Case |                               |                 |
|--------------------|----------------------------------------------------------|-------------------------------|-----------------|-----------------------------------------------------------|-------------------------------|-----------------|
|                    | Total N<br>of controls                                   | N of OCB negative<br>patients | Specificity (%) | Total N<br>of controls                                    | N of OCB negative<br>patients | Specificity (%) |
| Bayart 2018        | 39                                                       | 39                            | 100             | 39                                                        | 39                            | 100             |
| Christiansen 2018  | 94                                                       | 91                            | 97              | 94                                                        | 88                            | 94              |
| Gurtner 2018       | 144                                                      | 121                           | 84              | 144                                                       | 121                           | 84              |
| Dias-Carneiro 2016 | 26                                                       | 25                            | 96              | 26                                                        | 25                            | 96              |
| Zeman 2015         | 94                                                       | 83                            | 88              | 94                                                        | 83                            | 88              |
| Abraira 2011       | 29                                                       | 28                            | 97              | 29                                                        | 28                            | 97              |
| Gama 2009          | 19                                                       | 19                            | 100             | 19                                                        | 19                            | 100             |
| Mygland 2007       | 255                                                      | 245                           | 96              | 255                                                       | 245                           | 96              |
| Sa 2005            | 173                                                      | 167                           | 97              | 173                                                       | 167                           | 97              |
| Bednarova 2005     | 8                                                        | 8                             | 100             | 8                                                         | 7                             | 88              |
| Villar 2005        | 271                                                      | 271                           | 100             | 271                                                       | 269                           | 99              |
| Haghighi 2000      | 50                                                       | 48                            | 96              | 50                                                        | 48                            | 96              |
| Marchetti 1999     | 22                                                       | 20                            | 91              | 22                                                        | 20                            | 91              |
| Cowdrey 1993       | 135                                                      | 135                           | 100             | 135                                                       | 133                           | 99              |
| Öhman 1992         | 211                                                      | 207                           | 98              | 211                                                       | 207                           | 98              |
| Kostulas 1987      | 897                                                      | 813                           | 91              | 897                                                       | 813                           | 91              |
| Link 1983          | 888                                                      | 780                           | 88              | 888                                                       | 766                           | 86              |
| <b>Total</b>       | <b>3355</b>                                              | <b>3100</b>                   | <b>92</b>       | <b>3355</b>                                               | <b>3078</b>                   | <b>92</b>       |

(4) Studies from (1) and (2) are combined.

(5) Studies from (1) and (3) are combined.

*Abbreviations:* IND, inflammatory neurological disease; N, number; OCB, oligoclonal bands; PIND, peripheral inflammatory neurological disease; SC, symptomatic control
