# Supplementary material for: The clinical significance of single or double bands in cerebrospinal fluid isoelectric focusing. A retrospective study and systematic review
Source: PubMed Central journal article supplement (PMC6464233; doi:10.1371/journal.pone.0215410), 2019-04-15
Supplement: pone.0215410.s006.pdf [file pone.0215410.s006.pdf]

**S5 Table. Calculation of OCB diagnostic specificity using a cut-off  $\geq 3$  CSF-restricted bands**

| <b>Publication</b> | <b>Total N of controls</b> | <b>N of OCB negative patients</b> | <b>Specificity (%)</b> |
|--------------------|----------------------------|-----------------------------------|------------------------|
| Gurtner 2018       | 144                        | 127                               | 88                     |
| Hegen 2016         | 161                        | 161                               | 100                    |
| Öhman 1992         | 211                        | 207                               | 98                     |
| McLean 1990        | 486                        | 477                               | 98                     |
| <b>Total</b>       | 1002                       | 972                               | <b>97</b>              |

*Abbreviations:* CSF, cerebrospinal fluid; N, number; OCB, oligoclonal bands
